# Supplementary material
Source: Springer Nature journal article supplement (https://www.springermedizin.de/resource/supplementary/12958_2003_112_MOESM3_ESM.pdf/9566146)
Supplement: MOESM3 [file 9566146]

1

 $\alpha$  ▼

A

 $\alpha$ 

B

humLCN6 MGLLLLAAFLALVSVPRAQA^VWLGRDLPEQ LLGPWYVLAV ASREKGFAME KDMKNVVGWV  
 rhesLCN6 MGLLLLAALLALVAVPRAQA^MWLGRLDPKQ LLGPWYVLAV ASREKSFAVE KDMKNVAGVV  
 ratLcn5 MENIMPFALLGLCVGLAAGTEGA^VVKDFDISK. FLGFWYEIAF ASKMGTPGLA HKEEKMGAMV  
 mouseLcn8 MEARLLSNVCGFFLVFLQQA^ESTRVELVPEK. IAGFWKEVAV ASDQK..LVL KAQRREGLF  
 mouseMup1 MKMLLLLCLGLTLVCVHA^EEASSTGRNFNVEK. INGEWHTIIL ASDKREKIED NGNFRLFLEQ

41

C ▼

D

E ▼

F

G

humLCN6 VTLTPENNLR TLSSQHGLGG CDQSVMDLIK RNSGWVFENP SI.GVLELWV LATNFRDYAII  
 rhesLCN6 VTLTPENNLR LLSSQHGLQG CSQSVTELLK RNSGWVFENP SI.GVLELRV LATNFRDYAII  
 ratLcn5 VELK.ENLLA LTTTYISEDH CVLEKVTATE GDGPAKFQVT RLSGKKEVVV EATDYLTYAII  
 mouseLcn8 LTFSGGNVTV .KAVYNSSGS CVTESSLGSE RDTVGEFAFP GNREIHVL..TDYERYTIL  
 mouseMup1 IHVL.ENSLV LKFHTVRDEE CSELSMVADK TEKAGEYSV. TYDGFNTFTI PKTDYDNFLMA

100

H ▼

 $\alpha$ 

I

 $\alpha$ 

159

humLCN6 FTQLEFGDE PFNTVELYSL T.ETASQEAMG LFTKWSRSLG FLSQ  
 rhesLCN6 FTQLEFGDE PFNTVELYSR R.EAASQEAMG LFTKWSRGLG FLSQQQAQLQ KDLTCAHKIL S  
 ratLcn5 DITSLVAGA VHRTMKLYSR SLDDNG.EALY NFRKITSDHG FSETDLYILK HDLTCVKVLQ SAAESRP  
 mouseLcn8 KLTLWQGR NFHVLKYFTR SLENEDEPGFW LFREMTADQG .....LYMLA RHGRCAELLK EGLV  
 mouseMup1 HLINEKDGE TFQLMGLYGR EPDLSS.DIKE RFAQLCEKHG ILRENIIDLS NANRCLQARE
